# 1 **Spaniel: analysis and interactive sharing of Spatial Transcriptomics data**

2 Rachel Queen<sup>1</sup>, Kathleen Cheung<sup>1</sup>, Steven Lisgo<sup>2</sup>, Jonathan Coxhead<sup>3</sup>, Simon Cockell<sup>1</sup>

- 3 1. Bioinformatics Support Unit, Newcastle University, United Kingdom  
4 2. Institute of Genetic Medicine, Newcastle University, Newcastle, United Kingdom  
5 3. Genomics Core Facility, Newcastle University, United Kingdom

## 6 **Abstract**

7 Spatial Transcriptomics allows the sequencing of the complete transcriptomes from barcoded  
8 regions of intact tissue. The technology has the potential to answer a wide range of biological  
9 questions concerning cellular function, but analysis of the data presents a number of challenges  
10 which are not met by existing analysis tools. Here we present Spaniel, an R package providing a  
11 framework for analysing and sharing Spatial Transcriptomics data.

## 12 **Main**

13 Whilst technologies such as single cell RNAseq provide tools for dissecting cellular heterogeneity,  
14 dissociation of the tissue mean that information about spatial relationship of the cells is lost. Spatial  
15 Transcriptomics (ST) <sup>1</sup> is a method for sequencing spatially barcoded transcriptomes from intact  
16 tissue sections. This provides a method of linking gene expression data to spatial location of a cell  
17 within a tissue cross-section, to further elucidate cellular function. Computational analysis of  
18 Spatial Transcriptomics data has a unique set of requirements which are not satisfied by existing  
19 analysis tools. Firstly, there is a strong visual element to the analysis and gene expression must be  
20 linked back to a histological image of the tissue. Secondly, to answer complex questions there is  
21 need for data integration both between different Spatial Transcriptomics datasets and with other  
22 datasets such as single cell RNAseq. Finally, a close collaboration between a computational  
23 biologist analysing the data and the wet-lab biologist with specialised knowledge of the tissue type  
24 is required to interpret the experiments, but as each Spatial Transcriptomics dataset generates a  
25 large amount of data and a number of decisions must be taken during analysis, it difficult to share  
26 data in a static manner.  
27

28 Numerous tools exist for analysing single cell RNAseq and low input RNAseq experiments <sup>2</sup>, but  
29 these lack methods for visualising histological data. The ST Viewer tool <sup>3</sup> has been designed for  
30 analysing and visualising ST data but as it is a standalone tool it is not suitable for integrative  
31 analysis of multiple datasets.

32 Here we introduce Spaniel, an R package which provides a framework for analysing and sharing  
33 Spatial Transcriptomics data. Spaniel provides methods for thorough quality control, visualisation  
34 and pre-processing of the data. It uses two pre-existing S4 objects designed for single cell analysis,  
35 namely Seurat object <sup>4</sup> and SingleCellExperiment object <sup>5</sup>, providing strong potential for integration  
36 of and with other single cell datasets. Spaniel also provides a Shiny app which allows results to be  
37 shared in an interactive manner.

38

39 To test the Spaniel application and produce the figure presented here, we used publicly available  
40 sequencing data <sup>1</sup> from the mouse olfactory bulb and the hematoxylin and eosin (H&E), HE\_Rep1  
41 taken from the Spatial Transcriptomics website (<http://www.spatialtranscriptomicsresearch.org/>).

42 Each Spatial Transcriptomics experiment involves sectioning a 5-16  $\mu\text{m}$  slice of tissue which is  
43 placed on a slide containing a grid of spatially barcoded polyT probes. The probes are positioned in  
44 spots on the slide in a 35 \* 35 grid, where each spot covers 10 – 100 cells. The sequencing data was  
45 generated using paired end sequencing where read 1 contains the spatial barcode and UMI and read  
46 2 contains the transcript sequence. Spaniel takes a spatial transcriptomic expression matrix where  
47 each row corresponds to a gene and each column corresponds to a spot coordinate. To create the  
48 expression data, from the sequencing data, the paired FASTQ files were demultiplexed with a  
49 publically available perl script

50 ([https://github.com/tallulandrews/scRNASeqPipeline/blob/master/0\\_custom\\_undo\\_demultiplexing.](https://github.com/tallulandrews/scRNASeqPipeline/blob/master/0_custom_undo_demultiplexing.pl)

51 [pl](https://github.com/tallulandrews/scRNASeqPipeline/blob/master/0_custom_undo_demultiplexing.pl)) using the spatial barcodes encoded in read 1. Read 2 from successfully demultiplexed pairs were  
52 trimmed for quality using Trimmomatic version 0.36 <sup>6</sup>. A reference was created using Ensembl  
53 mouse reference genome Release M20 (GRCm38.p6). The trimmed reads were aligned to this

54 reference using STAR version 2.5.3a<sup>7</sup> in single read alignment mode. The number of reads were  
55 quantified using HTSEQ version 0.6.1<sup>8</sup> and a count matrix was created. The H & E images were  
56 cropped to region around the edges of the spots and resized to 1000 x 1071 pixels with a resolution  
57 of 72dpi using a photo editor.

58 Spaniel includes a series of tools to aid the quality control and analysis of Spatial Transcriptomics  
59 data and is designed to be used alongside existing tools to aid integration of multiple datasets. It  
60 includes functions to create either a Seurat S4 object or SingleCellExperiment S4 object which are  
61 designed for single cell experiment analysis and contain slots for both expression data and  
62 metadata. The package provides function to import a raw count matrix file and a barcodes text file.  
63 The barcodes can be either be barcode file provided by Spatial Transcriptomics giving the  
64 coordinates of each probe or adjusted barcodes obtained by pre-processing the image using ST Spot  
65 Detector. The Scater R<sup>9</sup> package is used to calculate QC metrics for SingleCellExperiment objects.  
66 Spaniel also provides a function to create a rasterised grob, compatible with ggplot2, from a pre-  
67 processed H&E image which is used as the background image for the plots. In this example, the  
68 sample is from the mouse olfactory bulb which is a multi-layered structure found in the forebrain of  
69 vertebrates (Figure 1A).

70 The ST\_plot function provides a method to visualise metrics contained within the Seurat object  
71 overlaid onto the image of the tissue. This plot can be used initially as a quality control step as well  
72 as to visualise different clustering solutions or gene expression of specific genes.

73 Quality Control is a crucial first step in the analysis of this data. By inspecting the number of genes  
74 and number of reads per spot, using the ST\_plot function, it is possible to pinpoint potential  
75 problems with the data that may confound downstream analysis. For example, spots which fall  
76 outside of the tissue with high number of counts may be an indicator of overall background RNA  
77 contamination. Figure 1B shows the number of genes per spot where spots with at least 2000 genes  
78 per spot are coloured in blue and spots with fewer than 2000 genes are coloured in red. The  
79 majority of spots above this threshold fall within the tissue area as expected, but a few fall outside

80 the tissue area perhaps indicating contamination. One of the primary aims of Spatial  
81 Transcriptomics analysis is the identification of anatomical regions which share similar  
82 transcriptomes. As the package is tightly integrated with the Seurat package and  
83 SingleCellExperiment object it possible to choose a wide range of clustering methods such as the  
84 Seurat FindClusters function to identify regions sharing gene expression patterns. After clustering  
85 Seurat can be used to detect genes which are differentially expressed between clusters. The clusters,  
86 shown in figure 1C, appear to match the different layers of the olfactory bulb. For example, spots  
87 which fall into cluster 0 are detected in the granule cell layer. Through differential gene expression,  
88 *Nrgn* was found to be upregulated in cluster 0 compared to the other clusters (Figure 1D). This gene  
89 is neuron-specific and is the top gene associated with the granule cell layer of the olfactory bulb in  
90 the Allen Mouse Brain Atlas<sup>10</sup>.

91

92 Spaniel's Shiny application can be hosted on a local computer or any service running R server (e.g.  
93 shinyserver.io) and offers the user 4 plots showing a) the number of genes detected per spot, b) the  
94 number of reads detected per spot, c) clustering results, d) the gene expression of a selected gene.  
95 The app uses a pre-processed S4 object and grob which are both saved in in RDS format allowing  
96 data to be transferred between the computational biologist performing the analysis and other  
97 researchers within the group. The gene plot allows users to select any individual gene to plot, whilst  
98 the cluster plot enables the visualisation of clustering results at multiple resolutions. Installation  
99 instruction and code can be found here: <https://github.com/RachelQueen1/Spaniel>

100

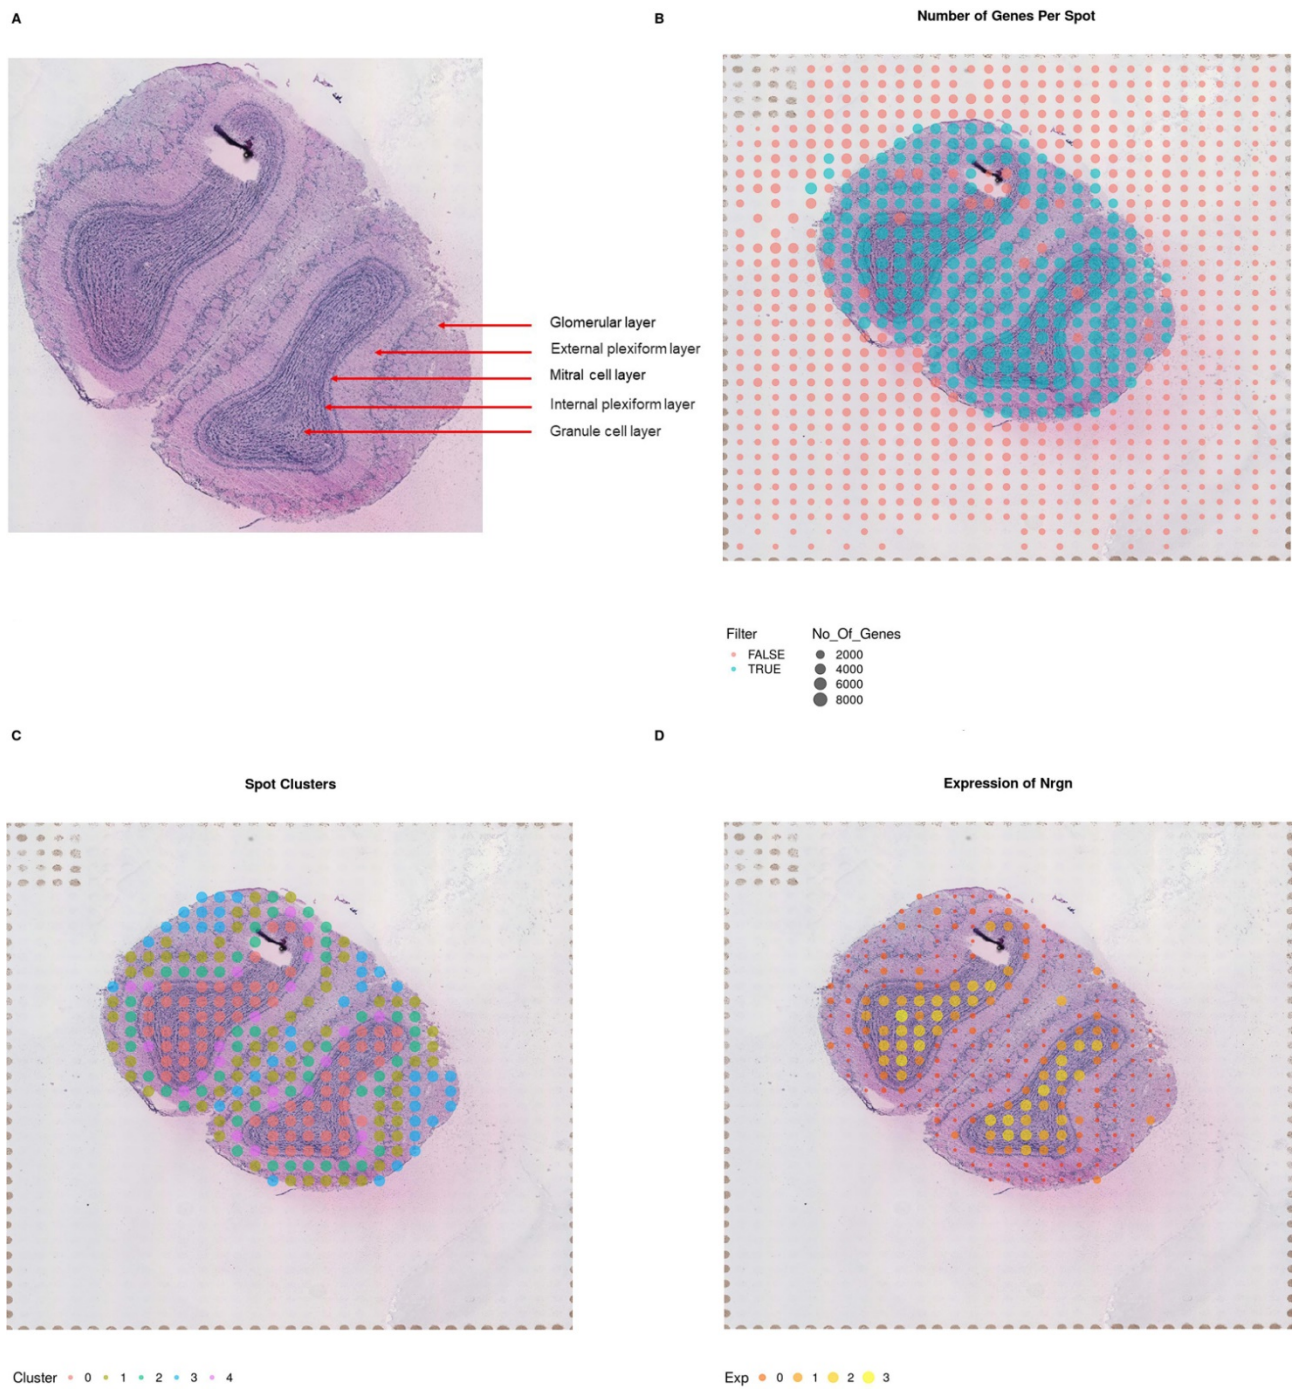

101

102 Figure 1: A) H&E image of mouse olfactory bulb showing the different layers. Example plots using  
103 Spaniel showing B) quality control metrics such as the number of genes detected per spot, C) the  
104 results of Seurat's FindClusters clustering analysis, D) the expression of the *Nrgn* gene.

105

106

107



108 **References**

- 109 1. Patrik L. Ståhl et al. Visualization and analysis of gene expression in tissue sections by  
110 spatial transcriptomics. *Science* **353**, 78-82 (2016).
- 111 2. Zappia, L., Phipson, B. & Oshlack, A. Exploring the single-cell RNA-seq analysis landscape  
112 with the scRNA-tools database. *PLoS Comput Biol* **14**, e1006245 (2018).
- 113 3. Fernandez Navarro, J., Lundeborg, J. & Stahl, P.L. ST viewer: a tool for analysis and  
114 visualization of spatial transcriptomics datasets. *Bioinformatics* **35**, 1058-1060 (2019).
- 115 4. Butler, A., Hoffman, P., Smibert, P., Papalexi, E. & Satija, R. Integrating single-cell  
116 transcriptomic data across different conditions, technologies, and species. *Nat Biotechnol*  
117 **36**, 411-420 (2018).
- 118 5. Lun A, R.D. SingleCellExperiment: S4 Classes for Single Cell Data. . (2019).
- 119 6. Bolger, A.M., Lohse, M. & Usadel, B. Trimmomatic: a flexible trimmer for Illumina  
120 sequence data. *Bioinformatics* **30**, 2114-2120 (2014).
- 121 7. Dobin, A. et al. STAR: ultrafast universal RNA-seq aligner. *Bioinformatics* **29**, 15-21  
122 (2013).
- 123 8. Anders, S., Pyl, P.T. & Huber, W. HTSeq--a Python framework to work with high-  
124 throughput sequencing data. *Bioinformatics* **31**, 166-169 (2015).
- 125 9. McCarthy, D.J., Campbell, K.R., Lun, A.T. & Wills, Q.F. Scater: pre-processing, quality  
126 control, normalization and visualization of single-cell RNA-seq data in R. *Bioinformatics*  
127 **33**, 1179-1186 (2017).
- 128 10. Lein, E.S. et al. Genome-wide atlas of gene expression in the adult mouse brain. *Nature* **445**,  
129 168-176 (2007).
- 130
